# Supplementary material
Source: PubMed Central journal article supplement (PMC3895492)
Supplement: NIHMS508440-supplement-Supplementary_Materials.pdf [file NIHMS508440-supplement-Supplementary_Materials.pdf]

Web-Based Supplementary Materials for "Inverse Probability of Censoring Weighted Estimates of Kendall's  $\tau$  for Gap Time Analyses" by Lakhali-Chaieb, M.L., Cook, R.J. & Lin, X.

## Web Appendix A: Asymptotic expression for $\sqrt{n}(\hat{\gamma} - \gamma)$

One has:

$$\begin{aligned}\sqrt{n}\{\hat{\gamma} - \gamma\} &= \sqrt{n} \left[ \binom{n}{2}^{-1} \sum_{i < j} \frac{L_{ij}\xi_{ij}}{\hat{p}_{ij}} - \gamma \right] \\ &= \sqrt{n} \binom{n}{2}^{-1} \sum_{i < j} \left[ \frac{L_{ij}\xi_{ij}}{p_{ij}} - \gamma \right] + \sqrt{n} \binom{n}{2}^{-1} \sum_{i < j} L_{ij}\xi_{ij} \left[ \frac{1}{\hat{p}_{ij}} - \frac{1}{p_{ij}} \right] \\ &= A + B\end{aligned}$$

Calculations, similar to those presented in Appendix B of Lakhali-Chaieb et al. (2009), show that  $B$  is asymptotically equivalent to

$$\frac{1}{\sqrt{n}} \sum_{k=1}^n \int_0^\infty \frac{q(u)}{\Pr(\tilde{X} + \tilde{Y} > u)} dM_k^c(u),$$

where

$$q(u) = E \left[ \frac{L_{12}\xi_{12}}{p_{12}} \{1(\tilde{X}_1 + \tilde{Y}_{12} > u) + 1(\tilde{X}_2 + \tilde{Y}_{12} > u)\} \right].$$

Standard theory of U-statistics shows that the distribution of  $\sqrt{n}\{\hat{\gamma} - \gamma\}$  is asymptotically normal with mean zero and variance equal to  $Var(A) + Var(B) + 2Cov(A, B)$ .

The first term  $A$  is a U-statistics of order 2. Thus, its asymptotic variance is equal to

$$\lim_{n \rightarrow \infty} \frac{4}{n^3} \sum_{i < j < k} \left[ \frac{L_{ij}\xi_{ij}}{p_{ij}} - \gamma \right] \left[ \frac{L_{ik}\xi_{ik}}{p_{ik}} - \gamma \right] + \left[ \frac{L_{ij}\xi_{ij}}{p_{ij}} - \gamma \right] \left[ \frac{L_{jk}\xi_{jk}}{p_{jk}} - \gamma \right] + \left[ \frac{L_{ik}\xi_{ik}}{p_{ik}} - \gamma \right] \left[ \frac{L_{jk}\xi_{jk}}{p_{jk}} - \gamma \right].$$

On the other hand, standard martingale variance calculation yields

$$Var(B) = \int_0^\infty \frac{q^2(u)}{\Pr(\tilde{X} + \tilde{Y} > u)} d\Lambda^c(u).$$

To compute  $Cov(A, B)$ , we follow the lines of Cheng et al. (1995) and write

$$L_{ij} = \delta_{Y_j} I(\tilde{Y}_i > \tilde{Y}_j) + \delta_{Y_i} I(\tilde{Y}_i < \tilde{Y}_j).$$

Hence, one has:

$$\begin{aligned} q(u) &= 2E \left[ \frac{\delta_{Y_1} I(\tilde{Y}_1 < \tilde{Y}_2) \xi_{12}}{G(\tilde{X}_1 + \tilde{Y}_1) G(\tilde{X}_2 + \tilde{Y}_1)} \{I(\tilde{X}_1 + \tilde{Y}_1 > u) + I(\tilde{X}_2 + \tilde{Y}_1 > u)\} \right], \\ A &= \frac{2}{n^{3/2}} \sum_{i \neq j} \left[ \frac{\delta_{Y_j} I(\tilde{Y}_i > \tilde{Y}_j) \xi_{ij}}{G(\tilde{X}_i + \tilde{Y}_j) G(\tilde{X}_j + \tilde{Y}_j)} - \gamma/2 \right] \\ Cov(A, B) &= Cov \left[ \frac{2}{n^{3/2}} \sum_{i \neq j} \left\{ \frac{\delta_{Y_j} I(\tilde{Y}_i > \tilde{Y}_j) \xi_{ij}}{G(\tilde{X}_i + \tilde{Y}_j) G(\tilde{X}_j + \tilde{Y}_j)} - \gamma/2 \right\}; \frac{1}{\sqrt{n}} \sum_{k=1}^n \int_0^\infty \frac{q(u)}{\Pr(\tilde{X} + \tilde{Y} > u)} dM_k^c(u) \right] \\ &= \frac{2}{n^2} \sum_{i \neq j} E \left\{ \frac{\delta_{Y_j} I(\tilde{Y}_i > \tilde{Y}_j) \xi_{ij}}{G(\tilde{X}_i + \tilde{Y}_j) G(\tilde{X}_j + \tilde{Y}_j)} \times \int_0^\infty \frac{q(u)}{\Pr(\tilde{X} + \tilde{Y} > u)} [dM_i^c(u) + dM_j^c(u)] \right\} \end{aligned}$$

Calculations similar to those presented in Appendices 1 & 2 of Cheng et al. (1995) yield the following expression for  $Cov(A, B)$ :

$$-\frac{2}{n^2} \sum_{i \neq j} E \left\{ \int_0^\infty \frac{\delta_{Y_j} I(\tilde{Y}_j < \tilde{Y}_i) \xi_{ij}}{G(\tilde{X}_i + \tilde{Y}_j) G(\tilde{X}_j + \tilde{Y}_j)} \{I(\tilde{X}_j + \tilde{Y}_j > u) + I(\tilde{X}_i + \tilde{Y}_j > u)\} \frac{q(u)}{\Pr(\tilde{X} + \tilde{Y} > u)} d\Lambda^c(u) \right\}$$

which converges to

$$-\int_0^\infty \frac{q^2(u)}{\Pr(\tilde{X} + \tilde{Y} > u)} d\Lambda^c(u)$$

Putting all these pieces together leads to the asymptotic variance of  $\sqrt{n}(\hat{\gamma} - \gamma)$ .

## Web Appendix B: Asymptotic presentation of $\sqrt{n}\{\hat{\tau}_2 - \tau\}$

One has:

$$\sqrt{n}\{\hat{\tau}_2 - \tau\} = \sqrt{n} \left\{ \frac{\binom{n}{2}^{-1} \sum_{i < j} \frac{L_{ij} \psi_{ij}}{\hat{p}_{ij}}}{\binom{n}{2}^{-1} \sum_{i < j} \frac{L_{ij}}{\hat{p}_{ij}}} - \tau \right\}$$

$$\begin{aligned}
&= \sqrt{n} \left\{ \left[ \binom{n}{2}^{-1} \sum_{i < j} \frac{L_{ij} \psi_{ij}}{\hat{p}_{ij}} - \tau \right] - \tau \left[ \binom{n}{2}^{-1} \sum_{i < j} \frac{L_{ij}}{\hat{p}_{ij}} - 1 \right] \right\} + o_p(1) \\
&= \sqrt{n} \binom{n}{2}^{-1} \sum_{i < j} \frac{L_{ij} (\psi_{ij} - \tau)}{\hat{p}_{ij}} + o_p(1)
\end{aligned}$$

## Web Appendix C: Expression of $\tau_{\mathcal{A}}$

Let  $(U, V)$  be a pair of random variables following the Clayton copula with uniform marginals and a parameter  $\theta > 1$ . For  $(u, v) \in [0, 1]^2$ , one has

$$\Pr(U \leq u; V \leq v) = C_{\theta}(u, v) = \left[ u^{-(\theta-1)} + v^{-(\theta-1)} - 1 \right]^{-1/(\theta-1)}.$$

Kendall's tau restricted to  $\mathcal{A} = \{a \leq U \leq b\}$  is equal to  $\tau_{\mathcal{A}} = 4 \int_0^1 \int_a^b H_{\mathcal{A}}(u, v) h_{\mathcal{A}}(u, v) dudv - 1$ , where  $H_{\mathcal{A}}$  and  $h_{\mathcal{A}}$  are the cumulative distribution and the density functions of  $(U, V | a \leq U \leq b)$ , respectively. On the other side, for  $(u, v) \in [a, b] \times [0, 1]$ , one has

$$H_{\mathcal{A}}(u, v) = P(U \leq u; V \leq v | a \leq U \leq b) = \frac{P(a \leq U \leq u; V \leq v)}{P(a \leq U \leq b)} = \frac{C_{\theta}(u, v) - C_{\theta}(a, v)}{b - a}$$

and hence  $h_{\mathcal{A}}(u, v) = C_{\theta}^{11}(u, v)/(b - a)$  where  $C_{\theta}^{ij}(u, v) = \partial^{i+j} C_{\theta}(u, v) / \partial^i u \partial^j v$ . So

$$\tau_{\mathcal{A}} = \frac{4}{(b-a)^2} \int_0^1 \int_a^b C_{\theta}^{11}(u, v) [C_{\theta}(u, v) - C_{\theta}(a, v)] dudv - 1 = \frac{4}{(b-a)^2} (\mathcal{I}_1 - \mathcal{I}_2) - 1.$$

Tedious but straightforward computations show that  $\mathcal{I}_1 = \theta(b^2 - a^2) / \{2(\theta + 1)\}$  and

$$\mathcal{I}_2 = \frac{1}{\theta - 1} \int_0^{\infty} (a^{-(\theta-1)} + t)^{-1/(\theta-1)} (b^{-(\theta-1)} + t)^{-\theta/(\theta-1)} dt - \frac{a^2}{2}.$$

The expression of  $\tau_{\mathcal{A}}$  when  $\theta > 1$  is obtained by putting together  $\mathcal{I}_1$  and  $\mathcal{I}_2$ . Expression for  $\tau_{\mathcal{A}}$  when  $\theta < 1$  is obtained by similar computations.
